# Supplementary material for: An endohedral redox system in a fullerene cage: the Ce based mixed-metal cluster fullerene Lu2CeN@C80
Source: Royal Society of Chemistry journal article supplement (doi:10.1039/c002918a), 2010-01-01
Supplement: c002918a.pdf [file c002918a.pdf]

**An endohedral redox sytem in a fullerene cage: The Ce based mixed cluster fullerene**

**Lu<sub>2</sub>CeN@C<sub>80</sub>**

**Lin Zhang,<sup>a</sup> Alexey A. Popov,<sup>a,b</sup> Shangfeng Yang,<sup>a,c</sup> Sabrina Klod,<sup>a</sup> Peter Rapta<sup>a,d</sup>  
and Lothar Dunsch<sup>\*a</sup>**

Supporting Information

Fig. S1 <sup>13</sup>C NMR spectra of Lu<sub>2</sub>CeN@C<sub>80</sub> in a temperature range of 268 to 308 K

Table S1. Redox potentials of Ce-based endohedral metallofullerenes and their lanthanide analogues (V, vs Fc<sup>+0</sup>).

Table S2 DFT-optimized Cartesian coordinates

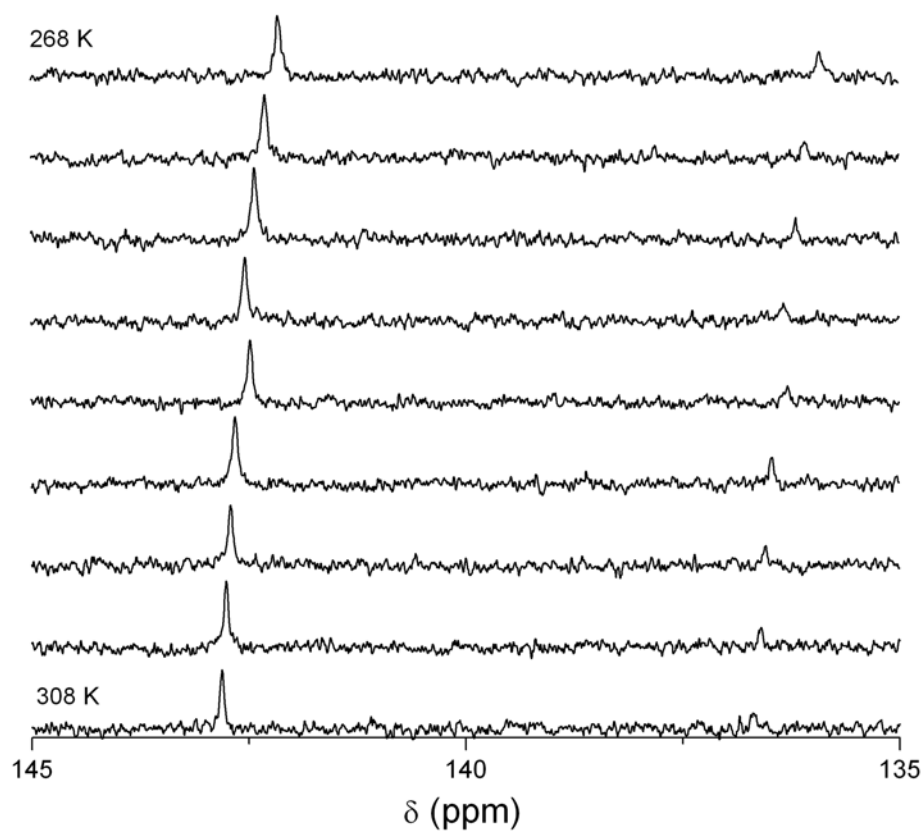

**Fig. S1**  $^{13}\text{C}$  NMR spectra of  $\text{Lu}_2\text{CeN}@C_{80}$  in a temperature range of 268 to 308 K

**Table S1. Redox potentials of Ce-based endohedral metallofullerenes and their lanthanide analogues (V, vs Fc<sup>+0</sup>).**

| compound                                                         | I <sub>red</sub> | II <sub>red</sub> | III <sub>red</sub> | I <sub>ox</sub> | II <sub>ox</sub> |
|------------------------------------------------------------------|------------------|-------------------|--------------------|-----------------|------------------|
| Ce@C <sub>82</sub> <sup>1</sup>                                  | -0.41            | -1.41             | -1.53              | 0.08            | 1.08             |
| La@C <sub>82</sub> <sup>1</sup>                                  | -0.42            | -1.37             | -1.53              | 0.07            | 1.07             |
| Ce <sub>2</sub> @C <sub>80</sub> (I <sub>h</sub> ) <sup>2</sup>  | -0.35            | -1.69             |                    | 0.57            | 0.95             |
| La <sub>2</sub> @C <sub>80</sub> (I <sub>h</sub> ) <sup>3</sup>  | -0.39            | -1.71             |                    | 0.57            | 0.95             |
| Ce <sub>2</sub> @C <sub>80</sub> (D <sub>5h</sub> ) <sup>4</sup> | -0.40            | -1.76             |                    | 0.20            | 0.66             |
| La <sub>2</sub> @C <sub>80</sub> (D <sub>5h</sub> ) <sup>4</sup> | -0.36            | -1.72             |                    | 0.22            | 0.78             |
| Ce <sub>2</sub> @C <sub>78</sub> <sup>5</sup>                    | -0.52            | -1.86             | -2.23              | 0.25            | 0.79             |
| La <sub>2</sub> @C <sub>78</sub>                                 | -0.40            | -1.84             | -2.28              | 0.26            | 0.62             |
| Ce <sub>2</sub> @C <sub>72</sub> <sup>6</sup>                    | -0.71            | -1.86             |                    | 0.18            | 0.82             |
| La <sub>2</sub> @C <sub>72</sub> <sup>7</sup>                    | -0.68            | -1.92             |                    | 0.24            | 0.75             |
| Ce <sub>3</sub> N@C <sub>88</sub> <sup>8</sup>                   | -1.30            | -1.57             |                    | 0.08            | 0.63             |
| La <sub>3</sub> N@C <sub>88</sub> <sup>8</sup>                   | -1.36            | -1.67             |                    | 0.21            | 0.66             |
| Pr <sub>3</sub> N@C <sub>88</sub> <sup>8</sup>                   | -1.34            | -1.72             |                    | 0.09            | 0.54             |
| Ce <sub>3</sub> N@C <sub>92</sub> <sup>9</sup>                   | -1.48            |                   |                    | 0.32            |                  |
| La <sub>3</sub> N@C <sub>92</sub> <sup>9</sup>                   | -1.44            | -1.64             |                    | 0.36            |                  |
| Pr <sub>3</sub> N@C <sub>92</sub> <sup>9</sup>                   | -1.46            |                   |                    | 0.35            |                  |
| Ce <sub>3</sub> N@C <sub>96</sub> <sup>9</sup>                   | -1.50            | -1.84             |                    | 0.18            | 0.67             |
| La <sub>3</sub> N@C <sub>96</sub> <sup>9</sup>                   | -1.54            | -1.77             |                    | 0.14            | 0.53             |
| Pr <sub>3</sub> N@C <sub>96</sub> <sup>9</sup>                   | -1.51            | -1.86             |                    | 0.14            | 0.53             |

1. T. Suzuki, K. Kikuchi, F. Oguri, Y. Nakao, S. Suzuki, Y. Achiba, K. Yamamoto, H. Funasaka and T. Takahashi, *Tetrahedron*, 1996, **52**, 4973-4982.
2. M. Yamada, T. Nakahodo, T. Wakahara, T. Tsuchiya, Y. Maeda, T. Akasaka, M. Kako, K. Yoza, E. Horn, N. Mizorogi, K. Kobayashi and S. Nagase, *J. Am. Chem. Soc.*, 2005, **127**, 14570-14571.
3. T. Suzuki, Y. Maruyama, T. Kato, K. Kikuchi, Y. Nakao, Y. Achiba, K. Kobayashi and S. Nagase, *Angew. Chem.-Int. Edit. Engl.*, 1995, **34**, 1094-1096.
4. M. Yamada, N. Mizorogi, T. Tsuchiya, T. Akasaka and S. Nagase, *Chem.-Eur. J.*, 2009, **15**, 9486-9493.
5. M. Yamada, T. Wakahara, T. Tsuchiya, Y. Maeda, M. Kako, T. Akasaka, K. Yoza, E. Horn, N. Mizorogi and S. Nagase, *Chem. Commun.*, 2008, 558-560.
6. M. Yamada, T. Wakahara, T. Tsuchiya, Y. Maeda, T. Akasaka, N. Mizorogi and S. Nagase, *J. Phys. Chem. A*, 2008, **112**, 7627-7631.
7. X. Lu, H. Nikawa, T. Tsuchiya, Y. Maeda, M. O. Ishitsuka, T. Akasaka, M. Toki, H. Sawa, Z. Slanina, N. Mizorogi and S. Nagase, *Angewandte Chemie International Edition*, 2008, **47**, 8642-8645.
8. M. N. Chaur, F. Melin, B. Elliott, A. Kumbhar, A. J. Athans and L. Echegoyen, *Chem.-Eur. J.*, 2008, **14**, 4594-4599.
9. M. N. Chaur, R. Valencia, A. Rodriguez-Forteza, J. M. Poblet and L. Echegoyen, *Angew. Chem.-Int. Edit.*, 2009, **48**, 1425-1428.

**Table S2. DFT (PBE0)-optimized Cartesian coordinates.**

**Lu<sub>2</sub>CeN@C<sub>80</sub> (PBE0, doublet)**

|   |              |              |              |
|---|--------------|--------------|--------------|
| C | -1.635485260 | 2.814349293  | -2.484352773 |
| C | -1.409633998 | 3.721095038  | -1.390393642 |
| C | -0.029644509 | 4.151022448  | -1.138843416 |
| C | -2.264962236 | 3.511965248  | -0.240720085 |
| C | -2.675559859 | 1.807935659  | -2.484139515 |
| C | -3.904306256 | 0.232193981  | -1.072390395 |
| C | -3.469631068 | 1.584318583  | -1.338894641 |
| C | -3.264412956 | 2.458472830  | -0.234278410 |
| C | -1.757734201 | 3.632734080  | 1.123415782  |
| C | -0.374502973 | 3.978012180  | 1.398520217  |
| C | 0.219316982  | 3.250545337  | 2.490324009  |
| C | -2.456021681 | 2.642309007  | 1.919973066  |
| C | -2.285338735 | 0.649140673  | 3.330015589  |
| C | -1.850856696 | 1.972468507  | 3.023294930  |
| C | -0.507366150 | 2.318719236  | 3.318614465  |
| C | -4.140672271 | -0.272238940 | 0.250896163  |
| C | -3.786270096 | 0.592225014  | 1.355486465  |
| C | -3.400851255 | 1.950975973  | 1.093557485  |
| C | -3.235734724 | -0.027991360 | 2.500772614  |
| C | 1.599394843  | 2.808589199  | 2.504419703  |
| C | 2.401485733  | 2.959098321  | 1.355005972  |
| C | 1.816352223  | 3.678830710  | 0.250272792  |
| C | 3.381394995  | 1.942617619  | 1.091616992  |
| C | 1.714894127  | 1.647272154  | 3.331623758  |
| C | 2.284290435  | -0.731859544 | 3.323324671  |
| C | 2.646632385  | 0.606630806  | 3.024296662  |
| C | 3.535869243  | 0.787812629  | 1.923492095  |
| C | -1.365450343 | -0.327887749 | 3.824633330  |
| C | 0.006200370  | -0.006108293 | 4.044616016  |
| C | 0.408588867  | 1.342456534  | 3.827868190  |
| C | 0.975715004  | -1.030428756 | 3.826672250  |
| C | 3.757745325  | 1.572105172  | -0.233231168 |
| C | 3.099028661  | 2.191370614  | -1.335682536 |
| C | 2.141092954  | 3.236706823  | -1.070746242 |
| C | 2.910524083  | 1.403226720  | -2.487474390 |
| C | 4.200248633  | 0.191657416  | -0.235602941 |
| C | 3.598049157  | -2.040766769 | -1.123589882 |
| C | 3.928363712  | -0.646060332 | -1.380357796 |
| C | 3.268566468  | 0.002509359  | -2.486382697 |
| C | 2.742262651  | -1.832657232 | 2.503630171  |
| C | 3.674473464  | -1.682734968 | 1.406603400  |
| C | 4.067293378  | -0.311454678 | 1.131806417  |
| C | 3.474208980  | -2.563137740 | 0.252747754  |
| C | 1.756267851  | 1.598184614  | -3.315388071 |
| C | 0.777882618  | 2.594133239  | -3.020264332 |
| C | 1.010851844  | 3.487145777  | -1.911902584 |
| C | -0.575812582 | 2.303218576  | -3.321250826 |
| C | 1.373692279  | 0.317749771  | -3.824487806 |

|    |              |              |              |
|----|--------------|--------------|--------------|
| C  | -0.399764836 | -1.348817773 | -3.830270126 |
| C  | 0.004235535  | -0.001806082 | -4.043947136 |
| C  | -0.962320469 | 1.022915498  | -3.828240731 |
| C  | 2.528246438  | -2.634057546 | -1.910988165 |
| C  | 1.871297226  | -1.977835423 | -3.012906651 |
| C  | 2.293269514  | -0.658205479 | -3.313668245 |
| C  | 0.518449239  | -2.318844651 | -3.312727897 |
| C  | -1.703878244 | -1.652217316 | -3.322141960 |
| C  | -2.636041431 | -0.628678976 | -3.016782345 |
| C  | -2.262847114 | 0.715189402  | -3.312899350 |
| C  | -3.533596956 | -0.867923186 | -1.910432000 |
| C  | -1.610798612 | -2.819344197 | -2.484899942 |
| C  | -1.886023699 | -3.680984461 | -0.237528617 |
| C  | -2.494104451 | -3.048162027 | -1.377052555 |
| C  | -3.576874129 | -2.095776332 | -1.131621734 |
| C  | 1.764830468  | -3.507986364 | -1.076933382 |
| C  | -0.484097698 | -4.037505991 | -0.233268211 |
| C  | 0.374714114  | -3.792826602 | -1.338880354 |
| C  | -0.222523267 | -3.218882016 | -2.482712324 |
| C  | 1.661834054  | -2.797360057 | 2.504641958  |
| C  | 0.020520965  | -3.914039943 | 1.095608047  |
| C  | 1.391820833  | -3.576513760 | 1.355311307  |
| C  | 2.305782969  | -3.439901361 | 0.248649277  |
| C  | -1.753191743 | -1.607319272 | 3.316090818  |
| C  | -1.052937311 | -3.447849603 | 1.921643149  |
| C  | -0.774867896 | -2.593736356 | 3.023717213  |
| C  | 0.591757221  | -2.311915075 | 3.328742388  |
| C  | -3.980415174 | -1.729643885 | 0.251675641  |
| C  | -2.255021641 | -3.319342083 | 1.120749258  |
| C  | -3.268580227 | -2.321228594 | 1.398889583  |
| C  | -2.929213565 | -1.444135296 | 2.491262240  |
| C  | 0.487997734  | 4.281786380  | 0.249646247  |
| N  | -0.169064193 | 0.084580516  | -0.036523285 |
| Lu | -1.794149533 | -1.096968033 | -0.003051236 |
| Lu | -0.229839671 | 2.097650148  | -0.063217102 |
| Ce | 1.758012548  | -0.766538117 | 0.049768062  |

**Lu<sub>2</sub>CeN@C<sub>80</sub><sup>+</sup> (PBE0, singlet)**

|   |              |              |              |
|---|--------------|--------------|--------------|
| C | -1.631702651 | 2.809664264  | -2.483640669 |
| C | -1.406895171 | 3.717639169  | -1.391829705 |
| C | -0.031085548 | 4.151899556  | -1.141580856 |
| C | -2.254736953 | 3.499283990  | -0.242345019 |
| C | -2.671779782 | 1.805296411  | -2.486246661 |
| C | -3.895610460 | 0.230292504  | -1.072564796 |
| C | -3.461478198 | 1.580249551  | -1.339705448 |
| C | -3.254296527 | 2.450326818  | -0.235335177 |
| C | -1.747541029 | 3.615446183  | 1.118892173  |
| C | -0.371796755 | 3.963225141  | 1.393523166  |
| C | 0.219684556  | 3.247200971  | 2.492807751  |
| C | -2.449238006 | 2.635064444  | 1.920024232  |
| C | -2.284901756 | 0.650012416  | 3.336695112  |
| C | -1.849485359 | 1.971769930  | 3.028033057  |
| C | -0.506989296 | 2.319652310  | 3.323127457  |
| C | -4.127576894 | -0.272549872 | 0.250154545  |
| C | -3.777622543 | 0.589671215  | 1.356570112  |
| C | -3.389054278 | 1.944023705  | 1.092053146  |
| C | -3.231788427 | -0.026574336 | 2.503974531  |
| C | 1.597850675  | 2.811578382  | 2.508033907  |
| C | 2.395610042  | 2.963136343  | 1.357456656  |
| C | 1.812028124  | 3.676771949  | 0.248236380  |
| C | 3.368897760  | 1.945040188  | 1.091678563  |
| C | 1.714845295  | 1.652260510  | 3.339891801  |
| C | 2.277902081  | -0.726599831 | 3.319811681  |
| C | 2.639168098  | 0.613647785  | 3.027384094  |
| C | 3.519404005  | 0.790748661  | 1.920023175  |
| C | -1.365239970 | -0.326061469 | 3.830089901  |
| C | 0.005141645  | -0.002016472 | 4.050346338  |
| C | 0.408162780  | 1.345091787  | 3.834790053  |
| C | 0.974394765  | -1.025826680 | 3.822260043  |
| C | 3.733236624  | 1.573079984  | -0.234138923 |
| C | 3.090901224  | 2.195358200  | -1.341791231 |
| C | 2.136149053  | 3.239850417  | -1.074547442 |
| C | 2.904228686  | 1.411483690  | -2.494564442 |
| C | 4.162174001  | 0.195101713  | -0.234720498 |
| C | 3.571357885  | -2.022658955 | -1.113796603 |
| C | 3.891548081  | -0.631763753 | -1.376513892 |
| C | 3.251656523  | 0.010312031  | -2.486243114 |
| C | 2.741822526  | -1.828796350 | 2.499359797  |
| C | 3.689731122  | -1.688221033 | 1.417354576  |
| C | 4.045655634  | -0.311405231 | 1.129388982  |
| C | 3.475261468  | -2.560768070 | 0.258224231  |
| C | 1.755088336  | 1.605070086  | -3.326148868 |
| C | 0.778170433  | 2.598944503  | -3.027809456 |
| C | 1.009817935  | 3.492616261  | -1.917824202 |
| C | -0.574650632 | 2.301040559  | -3.323524250 |
| C | 1.370456630  | 0.323429193  | -3.836173731 |
| C | -0.401217515 | -1.346545505 | -3.839112660 |
| C | 0.002167831  | 0.000398126  | -4.055865504 |

|    |              |              |              |
|----|--------------|--------------|--------------|
| C  | -0.963777012 | 1.023908295  | -3.836223481 |
| C  | 2.506204585  | -2.610642912 | -1.898618935 |
| C  | 1.860744057  | -1.967661379 | -3.016042671 |
| C  | 2.282292375  | -0.651404383 | -3.319000091 |
| C  | 0.514582812  | -2.315223715 | -3.319596089 |
| C  | -1.703533729 | -1.648326636 | -3.325236574 |
| C  | -2.636248103 | -0.626937117 | -3.022299147 |
| C  | -2.263041517 | 0.716142846  | -3.319622218 |
| C  | -3.530091112 | -0.868338819 | -1.912728959 |
| C  | -1.610870519 | -2.814222952 | -2.486575797 |
| C  | -1.885566469 | -3.674066889 | -0.240074095 |
| C  | -2.494681242 | -3.046540346 | -1.381242220 |
| C  | -3.574646480 | -2.094739037 | -1.134329184 |
| C  | 1.754466110  | -3.494070175 | -1.069450461 |
| C  | -0.487228107 | -4.030560241 | -0.235549872 |
| C  | 0.367601814  | -3.786267517 | -1.340584813 |
| C  | -0.224147968 | -3.214055311 | -2.485418375 |
| C  | 1.657708517  | -2.795859124 | 2.504443246  |
| C  | 0.017897455  | -3.906772941 | 1.093736645  |
| C  | 1.387827769  | -3.576869811 | 1.357151089  |
| C  | 2.304315856  | -3.440860650 | 0.252271690  |
| C  | -1.751291316 | -1.605231848 | 3.318232097  |
| C  | -1.053157855 | -3.441983025 | 1.920690329  |
| C  | -0.777127710 | -2.592003433 | 3.024283170  |
| C  | 0.590658770  | -2.307620970 | 3.323783083  |
| C  | -3.969129331 | -1.725556915 | 0.249468337  |
| C  | -2.250394293 | -3.309406553 | 1.117322570  |
| C  | -3.258431925 | -2.311553744 | 1.395278342  |
| C  | -2.922910159 | -1.440083512 | 2.490726856  |
| C  | 0.484729354  | 4.273874589  | 0.246477044  |
| N  | -0.025280632 | 0.016652329  | 0.006617620  |
| Lu | -1.790017726 | -1.102967523 | -0.032102081 |
| Lu | -0.196355587 | 2.096708396  | -0.100170977 |
| Ce | 1.754130711  | -0.871102434 | 0.153049170  |

**Lu<sub>2</sub>CeN@C<sub>80</sub><sup>+</sup> (PBE0, triplet)**

|   |              |              |              |
|---|--------------|--------------|--------------|
| C | -1.644045296 | 2.818449204  | -2.483305750 |
| C | -1.413296197 | 3.722458422  | -1.391546803 |
| C | -0.031903702 | 4.149598035  | -1.139150007 |
| C | -2.267553210 | 3.512511018  | -0.239741641 |
| C | -2.677912110 | 1.815053267  | -2.480031625 |
| C | -3.905771677 | 0.233543725  | -1.073592368 |
| C | -3.471063982 | 1.586025835  | -1.338596064 |
| C | -3.263992947 | 2.460221395  | -0.232566565 |
| C | -1.760462172 | 3.634952281  | 1.124297668  |
| C | -0.377372499 | 3.977656432  | 1.398323017  |
| C | 0.219874929  | 3.251886543  | 2.486664798  |
| C | -2.458182057 | 2.644025793  | 1.919468860  |
| C | -2.276923086 | 0.646886841  | 3.319171288  |
| C | -1.851109851 | 1.973008810  | 3.020019284  |
| C | -0.505343376 | 2.312966345  | 3.312298766  |
| C | -4.141626555 | -0.271227541 | 0.248098313  |
| C | -3.787999159 | 0.595071455  | 1.354422176  |
| C | -3.403274661 | 1.953282382  | 1.095123322  |
| C | -3.237253389 | -0.029693293 | 2.494695572  |
| C | 1.596668460  | 2.808062605  | 2.498127554  |
| C | 2.398681328  | 2.952129997  | 1.353730617  |
| C | 1.811301892  | 3.674626467  | 0.246457749  |
| C | 3.382127836  | 1.936843772  | 1.093276930  |
| C | 1.707600534  | 1.637869557  | 3.322607364  |
| C | 2.284307577  | -0.733994804 | 3.321944201  |
| C | 2.649300070  | 0.600658871  | 3.023049444  |
| C | 3.540251590  | 0.783377997  | 1.924780575  |
| C | -1.362310200 | -0.330615482 | 3.828882679  |
| C | 0.006805589  | -0.008276458 | 4.050791275  |
| C | 0.408460424  | 1.338989234  | 3.830776993  |
| C | 0.976007235  | -1.031557830 | 3.831925711  |
| C | 3.755397731  | 1.564684252  | -0.229822462 |
| C | 3.093896108  | 2.184160770  | -1.334682175 |
| C | 2.133810805  | 3.231390664  | -1.071059557 |
| C | 2.912073207  | 1.396755542  | -2.480438670 |
| C | 4.202633977  | 0.188631528  | -0.232436375 |
| C | 3.599414411  | -2.040869912 | -1.121397901 |
| C | 3.930145480  | -0.648453522 | -1.378514710 |
| C | 3.274635879  | 0.002670275  | -2.483922122 |
| C | 2.749804944  | -1.839072666 | 2.503743598  |
| C | 3.683024611  | -1.686394011 | 1.410069982  |
| C | 4.074582203  | -0.314942102 | 1.135095456  |
| C | 3.477187883  | -2.564507689 | 0.253707988  |
| C | 1.745157580  | 1.588863052  | -3.308953185 |
| C | 0.770116388  | 2.594094716  | -3.019694882 |
| C | 1.005675620  | 3.485766815  | -1.912247983 |
| C | -0.578484138 | 2.301001461  | -3.323179471 |
| C | 1.370175188  | 0.319767816  | -3.828601856 |
| C | -0.402274424 | -1.344171583 | -3.835355853 |
| C | 0.001379449  | 0.000603544  | -4.051888992 |



|    |              |              |              |
|----|--------------|--------------|--------------|
| C  | -0.963053890 | 1.024808111  | -3.836464464 |
| C  | 2.530813621  | -2.632533474 | -1.908121579 |
| C  | 1.874703594  | -1.975056767 | -3.008126592 |
| C  | 2.290875779  | -0.656732637 | -3.307495109 |
| C  | 0.516251460  | -2.307655640 | -3.301771281 |
| C  | -1.698869407 | -1.646221053 | -3.319237289 |
| C  | -2.636375839 | -0.626608060 | -3.015327674 |
| C  | -2.256791808 | 0.714447748  | -3.306879719 |
| C  | -3.534705426 | -0.866222315 | -1.910182384 |
| C  | -1.609244634 | -2.820556596 | -2.480459251 |
| C  | -1.883782679 | -3.676825162 | -0.234633930 |
| C  | -2.493025530 | -3.045849558 | -1.377470963 |
| C  | -3.577407239 | -2.092503762 | -1.131975517 |
| C  | 1.768364391  | -3.505919208 | -1.075640794 |
| C  | -0.483225309 | -4.031573143 | -0.228651544 |
| C  | 0.377092981  | -3.785748095 | -1.335500774 |
| C  | -0.224203632 | -3.217869594 | -2.476820513 |
| C  | 1.668700827  | -2.796590195 | 2.499331488  |
| C  | 0.020990906  | -3.912849442 | 1.098423595  |
| C  | 1.393968088  | -3.576103007 | 1.356522397  |
| C  | 2.310091006  | -3.438938459 | 0.248294957  |
| C  | -1.748870869 | -1.603519116 | 3.315260453  |
| C  | -1.052687453 | -3.447492261 | 1.923028469  |
| C  | -0.775207673 | -2.592981327 | 3.023654799  |
| C  | 0.590972672  | -2.303273578 | 3.323166952  |
| C  | -3.978702235 | -1.725422398 | 0.249045164  |
| C  | -2.252992031 | -3.317422120 | 1.121955373  |
| C  | -3.266807593 | -2.317805443 | 1.399450074  |
| C  | -2.932344256 | -1.441923246 | 2.487530505  |
| C  | 0.485797143  | 4.279434333  | 0.246800812  |
| N  | -0.165445254 | 0.083720365  | -0.068773312 |
| Lu | -1.791673059 | -1.093790596 | -0.008966334 |
| Lu | -0.235234890 | 2.095773875  | -0.063352578 |
| Ce | 1.762741455  | -0.764720076 | 0.065389962  |

**Lu<sub>2</sub>CeN@C<sub>80</sub><sup>-</sup> (PBE0, triplet)**

|   |              |              |              |
|---|--------------|--------------|--------------|
| C | -1.638908673 | 2.820414425  | -2.494837355 |
| C | -1.418792096 | 3.744111176  | -1.405669533 |
| C | -0.023151331 | 4.172270200  | -1.148746148 |
| C | -2.264758168 | 3.510076108  | -0.244600513 |
| C | -2.678729359 | 1.815220606  | -2.494420637 |
| C | -3.908007505 | 0.236325942  | -1.078715472 |
| C | -3.472171816 | 1.586681748  | -1.344656200 |
| C | -3.266579863 | 2.459274645  | -0.238267749 |
| C | -1.757919190 | 3.621561769  | 1.113936129  |
| C | -0.368587033 | 3.971278540  | 1.393242783  |
| C | 0.226648466  | 3.251307414  | 2.492043969  |
| C | -2.454726555 | 2.638894853  | 1.913274574  |
| C | -2.281802101 | 0.650233043  | 3.323344387  |
| C | -1.848363790 | 1.972179596  | 3.019278297  |
| C | -0.501156894 | 2.322852379  | 3.319187921  |
| C | -4.144875017 | -0.271840610 | 0.244864448  |
| C | -3.788064595 | 0.591378942  | 1.351676676  |
| C | -3.404862007 | 1.948273743  | 1.090176960  |
| C | -3.237927641 | -0.031230812 | 2.500403997  |
| C | 1.605635037  | 2.820699706  | 2.513973441  |
| C | 2.401807017  | 2.961649909  | 1.354718722  |
| C | 1.816313342  | 3.675182548  | 0.244127409  |
| C | 3.382744919  | 1.950153822  | 1.091513000  |
| C | 1.722588666  | 1.647031484  | 3.331463174  |
| C | 2.291055188  | -0.737675184 | 3.323119254  |
| C | 2.653399661  | 0.609814794  | 3.027579195  |
| C | 3.540394531  | 0.789614526  | 1.920735080  |
| C | -1.362656824 | -0.329222116 | 3.816324082  |
| C | 0.009723919  | -0.007000530 | 4.036775279  |
| C | 0.412516583  | 1.342052065  | 3.822777959  |
| C | 0.981031667  | -1.032735787 | 3.818623304  |
| C | 3.753118635  | 1.578131204  | -0.234974850 |
| C | 3.102159577  | 2.195706750  | -1.342097308 |
| C | 2.143193083  | 3.239790112  | -1.078521676 |
| C | 2.915997271  | 1.408383627  | -2.496335478 |
| C | 4.183147599  | 0.195948694  | -0.234713683 |
| C | 3.591025252  | -2.041718978 | -1.120929452 |
| C | 3.918216027  | -0.638402289 | -1.381844255 |
| C | 3.268647373  | 0.007428241  | -2.491307035 |
| C | 2.754258838  | -1.841440732 | 2.507878796  |
| C | 3.696926396  | -1.696159187 | 1.413578559  |
| C | 4.067954690  | -0.306384953 | 1.130123277  |
| C | 3.481354059  | -2.569894515 | 0.250628203  |
| C | 1.755125256  | 1.604173140  | -3.318381321 |
| C | 0.779518177  | 2.601617084  | -3.027915266 |
| C | 1.014744843  | 3.501213581  | -1.922096125 |
| C | -0.582673380 | 2.311405096  | -3.334332432 |
| C | 1.375203925  | 0.319979506  | -3.827717687 |
| C | -0.400844283 | -1.347553794 | -3.832601497 |
| C | 0.003399256  | 0.000198328  | -4.047874893 |

|    |              |              |              |
|----|--------------|--------------|--------------|
| C  | -0.963106885 | 1.025867194  | -3.831197395 |
| C  | 2.525030092  | -2.630459980 | -1.909048999 |
| C  | 1.871171965  | -1.975417211 | -3.015667466 |
| C  | 2.296509905  | -0.653148999 | -3.323178928 |
| C  | 0.519859420  | -2.316360945 | -3.314336003 |
| C  | -1.705992729 | -1.657477546 | -3.332415366 |
| C  | -2.637451570 | -0.627312981 | -3.021662873 |
| C  | -2.264383291 | 0.714884420  | -3.316243292 |
| C  | -3.537564420 | -0.867092389 | -1.914561787 |
| C  | -1.611813455 | -2.820052282 | -2.490681362 |
| C  | -1.883712312 | -3.679280680 | -0.238183925 |
| C  | -2.500014577 | -3.055456514 | -1.385063482 |
| C  | -3.587512144 | -2.093956060 | -1.137726406 |
| C  | 1.765595377  | -3.513290379 | -1.079595468 |
| C  | -0.482252546 | -4.036468168 | -0.236117449 |
| C  | 0.375477019  | -3.792425636 | -1.342758937 |
| C  | -0.224515596 | -3.221103422 | -2.490208540 |
| C  | 1.672864652  | -2.805693674 | 2.507694736  |
| C  | 0.026589560  | -3.916126030 | 1.092859375  |
| C  | 1.399242166  | -3.584202844 | 1.353555297  |
| C  | 2.315904522  | -3.454836205 | 0.246177925  |
| C  | -1.755534412 | -1.608785446 | 3.313487882  |
| C  | -1.051914644 | -3.450272303 | 1.916528940  |
| C  | -0.772131001 | -2.598614161 | 3.022766205  |
| C  | 0.593310874  | -2.315315173 | 3.321895979  |
| C  | -3.987497708 | -1.729258743 | 0.244830375  |
| C  | -2.252059549 | -3.326495493 | 1.116868261  |
| C  | -3.281101850 | -2.326670972 | 1.398370292  |
| C  | -2.930461741 | -1.444506010 | 2.488326300  |
| C  | 0.489722574  | 4.277677933  | 0.239139158  |
| N  | -0.182820751 | 0.088575388  | -0.041953950 |
| Lu | -1.806884799 | -1.103705534 | -0.008787820 |
| Lu | -0.230873157 | 2.104437075  | -0.140224615 |
| Ce | 1.729087344  | -0.816658160 | 0.111128589  |

**Lu<sub>3</sub>N@C<sub>80</sub> (PBE0, singlet)**

|   |              |              |              |
|---|--------------|--------------|--------------|
| C | 0.418851574  | 3.217659867  | 2.496206532  |
| C | -2.996000973 | -1.246093830 | 2.496206532  |
| C | 2.577149399  | -1.971566037 | 2.496206532  |
| C | -0.143214631 | 3.915809213  | 1.377733771  |
| C | -3.319582939 | -2.081932115 | 1.377733771  |
| C | 3.462797570  | -1.833877098 | 1.377733771  |
| C | -1.574228503 | 3.805692514  | 1.129289096  |
| C | -2.508712145 | -3.266168132 | 1.129289096  |
| C | 4.082940647  | -0.539524382 | 1.129289096  |
| C | 0.719219061  | 4.056070282  | 0.239170360  |
| C | -3.872269434 | -1.405173164 | 0.239170360  |
| C | 3.153050374  | -2.650897119 | 0.239170360  |
| C | 1.765606007  | 2.703088235  | 2.493315777  |
| C | -3.223746083 | 0.177515538  | 2.493315777  |
| C | 1.458140076  | -2.880603773 | 2.493315777  |
| C | -3.249505129 | 2.169247216  | 1.077032479  |
| C | -0.253870632 | -3.898777599 | 1.077032479  |
| C | 3.503375761  | 1.729530383  | 1.077032479  |
| C | -3.719118580 | 0.833623273  | 1.344464413  |
| C | 1.137620358  | -3.637662806 | 1.344464413  |
| C | 2.581498222  | 2.804039533  | 1.344464413  |
| C | 2.058452248  | 3.518979152  | 0.234570587  |
| C | -4.076751465 | 0.023182364  | 0.234570587  |
| C | 2.018299217  | -3.542161516 | 0.234570587  |
| C | 0.207349679  | 3.985288004  | -1.115808642 |
| C | -3.555035493 | -1.813073912 | -1.115808642 |
| C | 3.347685813  | -2.172214092 | -1.115808642 |
| C | -1.197221390 | 3.798944975  | -1.392665504 |
| C | -2.691372161 | -2.936296626 | -1.392665504 |
| C | 3.888593552  | -0.862648350 | -1.392665504 |
| C | -1.462422213 | 2.912480585  | -2.493613479 |
| C | -1.791071068 | -2.722735080 | -2.493613479 |
| C | 3.253493281  | -0.189745505 | -2.493613479 |
| C | 1.244767007  | 3.383181321  | -1.924993478 |
| C | -3.552304473 | -0.613590810 | -1.924993478 |
| C | 2.307537466  | -2.769590511 | -1.924993478 |
| C | -2.218849616 | 0.865083079  | -3.340073259 |
| C | 0.360240885  | -2.354121674 | -3.340073259 |
| C | 1.858608731  | 1.489038595  | -3.340073259 |
| C | 0.944767376  | 2.539571428  | -3.030611023 |
| C | -2.671717059 | -0.451593166 | -3.030611023 |
| C | 1.726949683  | -2.087978262 | -3.030611023 |
| C | -0.429701261 | 2.340449656  | -3.324216024 |
| C | -1.812038228 | -1.542357036 | -3.324216024 |
| C | 2.241739489  | -0.798092620 | -3.324216024 |
| C | -3.130717372 | 2.708617170  | -0.248353761 |
| C | -0.780372593 | -4.065589362 | -0.248353761 |
| C | 3.911089965  | 1.356972191  | -0.248353761 |
| C | -3.377148724 | 1.815262277  | -1.358168316 |
| C | 0.116511116  | -3.832327726 | -1.358168316 |

|    |              |              |              |
|----|--------------|--------------|--------------|
| C  | 3.260637608  | 2.017065449  | -1.358168316 |
| C  | 2.384608886  | 3.119583191  | -1.097946447 |
| C  | -3.893942735 | 0.505340278  | -1.097946447 |
| C  | 1.509333849  | -3.624923469 | -1.097946447 |
| C  | -2.563929913 | 1.975446888  | -2.505439227 |
| C  | -0.428822232 | -3.208151882 | -2.505439227 |
| C  | 2.992752145  | 1.232704994  | -2.505439227 |
| C  | -0.895787182 | 1.087317885  | -3.835522161 |
| C  | -0.493751320 | -1.319433399 | -3.835522161 |
| C  | 1.389538502  | 0.232115513  | -3.835522161 |
| C  | 0.000000000  | 0.000000000  | -4.055523263 |
| C  | -2.115095887 | 3.757270312  | -0.248399925 |
| C  | -2.196343595 | -3.710361925 | -0.248399925 |
| C  | 4.311439482  | -0.046908386 | -0.248399925 |
| C  | -2.236627463 | 0.798921964  | 3.325954058  |
| C  | 0.426427015  | -2.336437183 | 3.325954058  |
| C  | 1.810200447  | 1.537515220  | 3.325954058  |
| C  | -1.721805662 | 2.092544234  | 3.027798880  |
| C  | -0.951293634 | -2.537399561 | 3.027798880  |
| C  | 2.673099296  | 0.444855327  | 3.027798880  |
| C  | -2.287894400 | 2.816999900  | 1.914575796  |
| C  | -1.295646276 | -3.389874622 | 1.914575796  |
| C  | 3.583540676  | 0.572874722  | 1.914575796  |
| C  | -0.361444229 | 2.347859407  | 3.335722992  |
| C  | -1.852583776 | -1.486949588 | 3.335722992  |
| C  | 2.214028005  | -0.860909819 | 3.335722992  |
| C  | 0.492917672  | 1.318287246  | 3.845440324  |
| C  | -1.388129081 | -0.232264397 | 3.845440324  |
| C  | 0.895211409  | -1.086022849 | 3.845440324  |
| C  | 0.000000000  | 0.000000000  | 4.061310242  |
| N  | 0.000000000  | 0.000000000  | 0.007485178  |
| Lu | -0.765761306 | 1.894086193  | 0.005822898  |
| Lu | -1.257446107 | -1.610211841 | 0.005822898  |
| Lu | 2.023207413  | -0.283874352 | 0.005822898  |

**Lu<sub>3</sub>N@C<sub>80</sub><sup>+</sup> (PBE0, doublet)**

|   |              |              |              |
|---|--------------|--------------|--------------|
| C | 0.422470773  | 3.221751215  | 2.492489402  |
| C | -3.001353654 | -1.245005368 | 2.492489402  |
| C | 2.578882880  | -1.976745847 | 2.492489402  |
| C | -0.143277386 | 3.917872773  | 1.377958506  |
| C | -3.321338669 | -2.083018397 | 1.377958506  |
| C | 3.464616055  | -1.834854376 | 1.377958506  |
| C | -1.574685969 | 3.806204732  | 1.129534659  |
| C | -2.508927235 | -3.266820183 | 1.129534659  |
| C | 4.083612675  | -0.539384549 | 1.129534659  |
| C | 0.718528511  | 4.056580714  | 0.237002615  |
| C | -3.872366176 | -1.406026596 | 0.237002615  |
| C | 3.153837665  | -2.650554118 | 0.237002615  |
| C | 1.762898971  | 2.707370820  | 2.488290910  |
| C | -3.226101052 | 0.173029848  | 2.488290910  |
| C | 1.463202611  | -2.880400668 | 2.488290910  |
| C | -3.245612346 | 2.169126119  | 1.077095310  |
| C | -0.255712205 | -3.895346227 | 1.077095310  |
| C | 3.501324552  | 1.726219579  | 1.077095310  |
| C | -3.714320511 | 0.832096298  | 1.343008995  |
| C | 1.136543612  | -3.632743605 | 1.343008995  |
| C | 2.577776370  | 2.800647836  | 1.343008995  |
| C | 2.054090394  | 3.516332019  | 0.231344122  |
| C | -4.072278228 | 0.020728931  | 0.231344122  |
| C | 2.018187305  | -3.537060421 | 0.231344122  |
| C | 0.207306775  | 3.989046584  | -1.117811266 |
| C | -3.558269316 | -1.814990650 | -1.117811266 |
| C | 3.350962541  | -2.174055934 | -1.117811266 |
| C | -1.197204258 | 3.800650488  | -1.393423711 |
| C | -2.692857605 | -2.937134819 | -1.393423711 |
| C | 3.890061863  | -0.863515668 | -1.393423711 |
| C | -1.465760654 | 2.914797189  | -2.490072121 |
| C | -1.791407866 | -2.726784746 | -2.490072121 |
| C | 3.257168519  | -0.188012443 | -2.490072121 |
| C | 1.244180910  | 3.385859134  | -1.925602983 |
| C | -3.554330649 | -0.615437374 | -1.925602983 |
| C | 2.310149739  | -2.770421760 | -1.925602983 |
| C | -2.210087613 | 0.861392609  | -3.331215233 |
| C | 0.359056289  | -2.344688609 | -3.331215233 |
| C | 1.851031854  | 1.483296000  | -3.331215233 |
| C | 0.942965811  | 2.540836094  | -3.028885687 |
| C | -2.671911711 | -0.453785896 | -3.028885687 |
| C | 1.728945900  | -2.087050199 | -3.028885687 |
| C | -0.429826866 | 2.335860345  | -3.320401496 |
| C | -1.808000748 | -1.540171442 | -3.320401496 |
| C | 2.237828143  | -0.795688904 | -3.320401496 |
| C | -3.128425516 | 2.708909668  | -0.245766319 |
| C | -0.781772071 | -4.063750537 | -0.245766319 |
| C | 3.910197587  | 1.354840869  | -0.245766319 |
| C | -3.377336206 | 1.813866677  | -1.357744993 |
| C | 0.117813377  | -3.831792040 | -1.357744993 |

|    |              |              |              |
|----|--------------|--------------|--------------|
| C  | 3.259522300  | 2.017925362  | -1.357744993 |
| C  | 2.383622296  | 3.121245639  | -1.099974289 |
| C  | -3.894889547 | 0.503654501  | -1.099974289 |
| C  | 1.511266722  | -3.624900669 | -1.099974289 |
| C  | -2.562751441 | 1.978182034  | -2.498776028 |
| C  | -0.431780060 | -3.208499029 | -2.498776028 |
| C  | 2.994531500  | 1.230316995  | -2.498776028 |
| C  | -0.894435495 | 1.086446401  | -3.839399492 |
| C  | -0.493672101 | -1.317827037 | -3.839399492 |
| C  | 1.388107596  | 0.231380635  | -3.839399492 |
| C  | 0.000000000  | 0.000000000  | -4.061293567 |
| C  | -2.114964299 | 3.756289559  | -0.246101817 |
| C  | -2.195560110 | -3.709757416 | -0.246101817 |
| C  | 4.310524409  | -0.046532143 | -0.246101817 |
| C  | -2.226984772 | 0.795005736  | 3.319459561  |
| C  | 0.424997066  | -2.326128246 | 3.319459561  |
| C  | 1.801987706  | 1.531122511  | 3.319459561  |
| C  | -1.719277832 | 2.093229401  | 3.025708507  |
| C  | -0.953150886 | -2.535553318 | 3.025708507  |
| C  | 2.672428717  | 0.442323916  | 3.025708507  |
| C  | -2.285927709 | 2.817696868  | 1.913842018  |
| C  | -1.297233046 | -3.388519838 | 1.913842018  |
| C  | 3.583160755  | 0.570822969  | 1.913842018  |
| C  | -0.359555303 | 2.341687116  | 3.331920627  |
| C  | -1.848182764 | -1.482227591 | 3.331920627  |
| C  | 2.207738066  | -0.859459525 | 3.331920627  |
| C  | 0.492123729  | 1.316787204  | 3.853096716  |
| C  | -1.386433280 | -0.232201919 | 3.853096716  |
| C  | 0.894309551  | -1.084585285 | 3.853096716  |
| C  | 0.000000000  | 0.000000000  | 4.071551138  |
| N  | 0.000000000  | 0.000000000  | 0.007935542  |
| Lu | -0.759414862 | 1.896754885  | 0.004070961  |
| Lu | -1.262930189 | -1.606050305 | 0.004070961  |
| Lu | 2.022345580  | -0.290704580 | 0.004070961  |

**Lu<sub>3</sub>N@C<sub>80</sub><sup>-</sup> (PBE0, doublet)**

|   |              |              |              |
|---|--------------|--------------|--------------|
| C | 2.582294486  | -1.973105108 | 2.498996695  |
| C | 0.417612397  | 3.222885242  | 2.498996695  |
| C | -2.999906354 | -1.249779605 | 2.498996695  |
| C | 3.484762891  | -1.847214369 | 1.387186299  |
| C | -0.142647136 | 3.941500538  | 1.387186299  |
| C | -3.342116285 | -2.094286168 | 1.387186299  |
| C | 4.094539656  | -0.536960917 | 1.132987540  |
| C | -1.582247912 | 3.814456193  | 1.132987540  |
| C | -2.512291744 | -3.277494747 | 1.132987540  |
| C | 3.166894056  | -2.658449442 | 0.236252770  |
| C | 0.718838079  | 4.071835836  | 0.236252770  |
| C | -3.885732135 | -1.413385864 | 0.236252770  |
| C | 1.464616572  | -2.883250817 | 2.500535013  |
| C | 1.764660072  | 2.710020411  | 2.500535013  |
| C | -3.229276645 | 0.173230406  | 2.500535013  |
| C | 3.490359470  | 1.727286400  | 1.076765633  |
| C | -3.241053484 | 2.159096623  | 1.076765633  |
| C | -0.249305456 | -3.886383023 | 1.076765633  |
| C | 2.575020415  | 2.803803320  | 1.344692307  |
| C | -3.715675205 | 0.828131702  | 1.344692307  |
| C | 1.140654260  | -3.631935022 | 1.344692307  |
| C | 2.020944318  | -3.537731947 | 0.232975576  |
| C | 2.053293982  | 3.519055165  | 0.232975576  |
| C | -4.074237771 | 0.018677311  | 0.232975576  |
| C | 3.359917807  | -2.185059117 | -1.119237399 |
| C | 0.212357772  | 4.002303533  | -1.119237399 |
| C | -3.572275579 | -1.817244416 | -1.119237399 |
| C | 3.893276086  | -0.859807194 | -1.398733476 |
| C | -1.202023475 | 3.801579723  | -1.398733476 |
| C | -2.691252611 | -2.941772529 | -1.398733476 |
| C | 3.255265598  | -0.185223679 | -2.501093295 |
| C | -1.467224358 | 2.911754420  | -2.501093295 |
| C | -1.788041240 | -2.726531270 | -2.501093295 |
| C | 2.312946441  | -2.767349886 | -1.925118785 |
| C | 1.240122120  | 3.386745506  | -1.925118785 |
| C | -3.553068562 | -0.619395091 | -1.925118785 |
| C | 1.855947911  | 1.493906004  | -3.343827644 |
| C | -2.221734275 | 0.860345367  | -3.343827644 |
| C | 0.365786365  | -2.354251371 | -3.343827644 |
| C | 1.729901065  | -2.087596310 | -3.036273531 |
| C | 0.942960520  | 2.541936254  | -3.036273531 |
| C | -2.672862114 | -0.454340473 | -3.036273531 |
| C | 2.248503236  | -0.793569020 | -3.334621547 |
| C | -0.437000922 | 2.344045659  | -3.334621547 |
| C | -1.811502843 | -1.550476639 | -3.334621547 |
| C | 3.888668539  | 1.350719107  | -0.248255040 |
| C | -3.114091162 | 2.692325782  | -0.248255040 |
| C | -0.774576848 | -4.043045418 | -0.248255040 |
| C | 3.252539277  | 2.013846464  | -1.362120231 |
| C | -3.370311907 | 1.809858160  | -1.362120231 |



|    |              |              |              |
|----|--------------|--------------|--------------|
| C  | 0.117772630  | -3.823704624 | -1.362120231 |
| C  | 1.508576914  | -3.619115703 | -1.099212273 |
| C  | 2.379957744  | 3.116023718  | -1.099212273 |
| C  | -3.888534658 | 0.503091986  | -1.099212273 |
| C  | 2.999147514  | 1.235334125  | -2.518108990 |
| C  | -2.569404786 | 1.979670610  | -2.518108990 |
| C  | -0.429742727 | -3.215005264 | -2.518108990 |
| C  | 1.390757187  | 0.233799505  | -3.839633388 |
| C  | -0.897855038 | 1.087531215  | -3.839633388 |
| C  | -0.492902149 | -1.321330719 | -3.839633388 |
| C  | 0.000000000  | 0.000000000  | -4.057789355 |
| C  | 4.297563271  | -0.046318355 | -0.246246283 |
| C  | -2.108668677 | 3.744958286  | -0.246246283 |
| C  | -2.188894594 | -3.698639931 | -0.246246283 |
| C  | 1.811241429  | 1.538246295  | 3.327092943  |
| C  | -2.237781046 | 0.799457704  | 3.327092943  |
| C  | 0.426539617  | -2.337703999 | 3.327092943  |
| C  | 2.672992291  | 0.446107004  | 3.029213248  |
| C  | -1.722836019 | 2.091826023  | 3.029213248  |
| C  | -0.950156272 | -2.537933028 | 3.029213248  |
| C  | 3.583248069  | 0.572086115  | 1.915003033  |
| C  | -2.287065440 | 2.817140703  | 1.915003033  |
| C  | -1.296183158 | -3.389226818 | 1.915003033  |
| C  | 2.219202691  | -0.866544679 | 3.345189217  |
| C  | -0.359152070 | 2.355158381  | 3.345189217  |
| C  | -1.860050622 | -1.488613702 | 3.345189217  |
| C  | 0.897854509  | -1.086371258 | 3.846119514  |
| C  | 0.491897770  | 1.320750212  | 3.846119514  |
| C  | -1.389752279 | -0.234379483 | 3.846119514  |
| C  | 0.000000000  | 0.000000000  | 4.063858489  |
| N  | 0.000000000  | 0.000000000  | -0.025984720 |
| Lu | 2.014919106  | -0.372755629 | 0.041821936  |
| Lu | -0.684643704 | 1.931348789  | 0.041821936  |
| Lu | -1.330275402 | -1.558593689 | 0.041821936  |
